# Supplementary material
Source: HighWire-hosted journal article supplement (https://qdcxjkg.com/highwire/filestream/113096/field_highwire_adjunct_files/3/suprathreshold_coughs_table_s2_and_s3_fig_s3_and_s4.pdf)

## **Online Data Supplement: Suprathreshold Reflex Coughs**

### **Number of coughs produced by suprathreshold tartaric acid cough stimulus**

We wanted to give a suprathreshold tartaric-acid stimulus of similar intensity to both stroke and control groups. We have reviewed all our reflex cough raw data files and counted the number of coughs (simultaneous spikes on the flow and gastric pressure traces) produced by each participant during a suprathreshold tartaric acid stimulus.

Statistical analyses were performed using GraphPad Prism software. Results for each group are given in Table S2 and a comparison between groups is shown in Table S3 and Figure S3.

### **Table S2**

#### **Number of Reflex Coughs Produced at Suprathreshold Tartaric Acid Concentration\***

|                                             | Stroke patients | Controls |
|---------------------------------------------|-----------------|----------|
| Number of values                            | 14              | 18       |
| Minimum                                     | 5.000           | 5.000    |
| 25% Percentile                              | 7.000           | 6.000    |
| Median                                      | 11.50           | 9.500    |
| 75% Percentile                              | 15.75           | 18.75    |
| Maximum                                     | 21.00           | 29.00    |
|                                             |                 |          |
| Mean                                        | 11.43           | 12.33    |
| Std. Deviation                              | 5.155           | 7.585    |
| Std. Error                                  | 1.378           | 1.788    |
|                                             |                 |          |
| Lower 95% CI of mean                        | 8.452           | 8.561    |
| Upper 95% CI of mean                        | 14.40           | 16.11    |
|                                             |                 |          |
| D'Agostino & Pearson omnibus normality test |                 |          |
| K2                                          | 1.612           | 2.715    |
| P value                                     | 0.4466          | 0.2573   |
| Passed normality test (alpha=0.05)?         | Yes             | Yes      |
| P value summary                             | ns              | ns       |

\*Suprathreshold tartaric acid stimulus=concentration of tartaric acid required to produce five or more coughs.

**Table S3**

Results of an unpaired t-test to compare number of reflex coughs elicited at maximum strength tartaric acid for stroke and control groups.

|                             |                     |
|-----------------------------|---------------------|
| Column A                    | stroke              |
| vs                          | vs                  |
| Column B                    | normal              |
|                             |                     |
| Unpaired t test             |                     |
| P value                     | 0.7050              |
| P value summary             | ns                  |
| One- or two-tailed P value? | Two-tailed          |
| Difference between means    | $-0.9048 \pm 2.367$ |
| 95% confidence interval     | -5.738 to 3.928     |

**Figure S3**

Scatter dot plot to show the number of coughs elicited by the maximum strength of tartaric acid administered to each participant. Horizontal lines show mean and the 95% confidence interval for the mean.

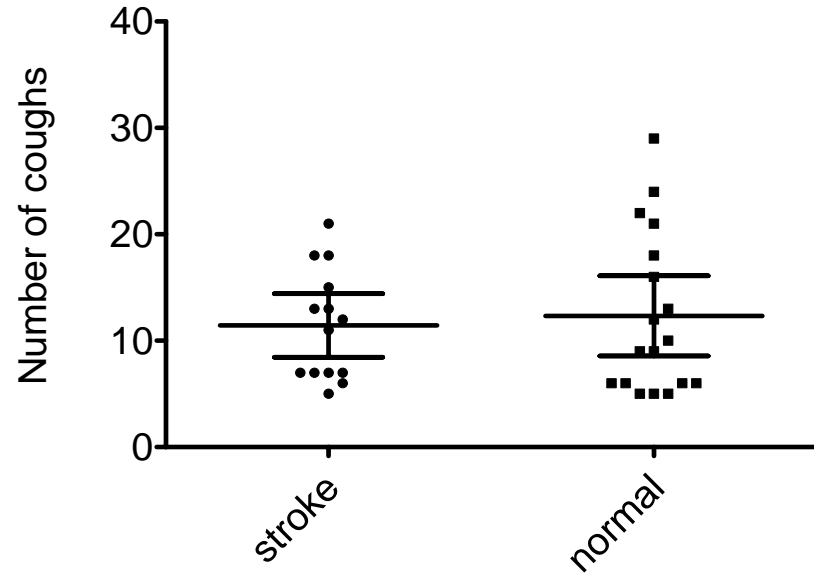

### **Figure S4: Cough Intensity and Increasing Stimulus Intensity**

In our early studies we continued to give participants higher concentrations of TA after they had reached 5 coughs. All four images in the panel below show tartaric acid stimuli causing five or more cough spikes on the flow and gastric pressure traces. The cough flow rate does not increase when the concentration of L-tartaric acid increases from 15% to 20% (Control Subject, Figure S4A) or from 10% to 20% (Stroke Patient, Figure S4B).

### **Figure S4**

Raw data acquired during reflex cough testing in a control subject (top panel, Figure S3A) and a stroke patient (bottom panel, Figure S3B).

### **Figure S4A Control Subject Reflex Coughs**

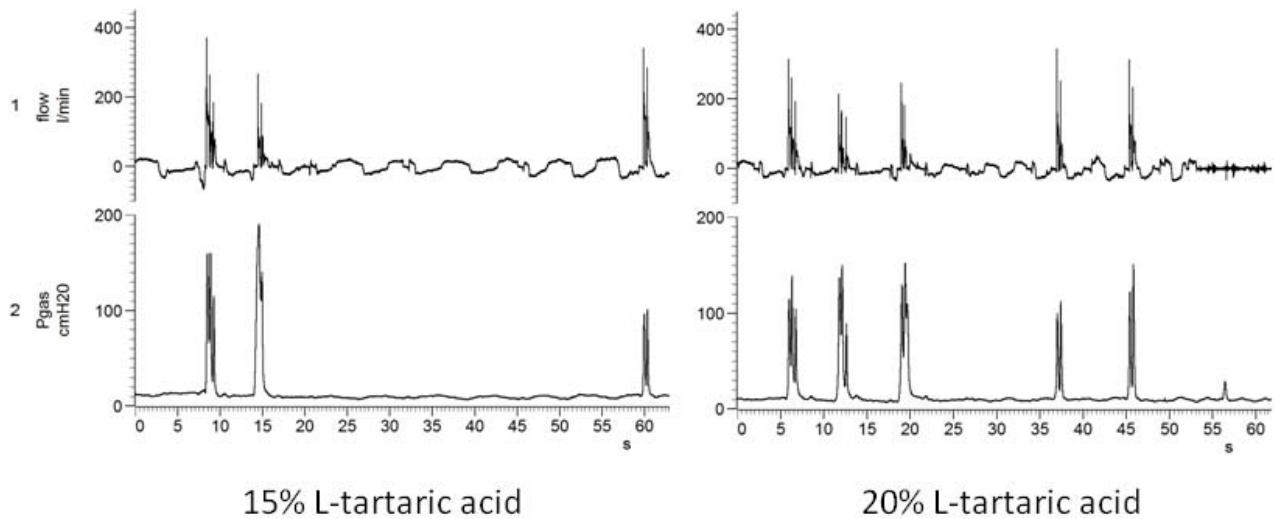

**Fi**

### **Figure S4B Stroke Patient Reflex Coughs**

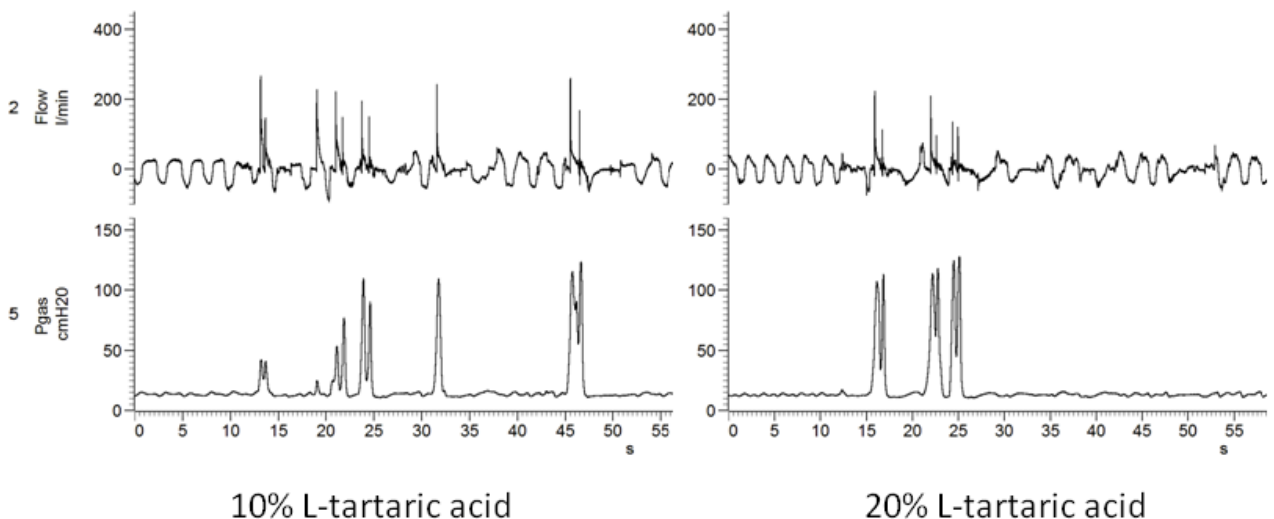

Supplement: suprathreshold_coughs_table_s2_and_s3_fig_s3_and_s4.pdf [file suprathreshold_coughs_table_s2_and_s3_fig_s3_and_s4.pdf]
